# Supplementary material
Source: Springer Nature journal article supplement (https://www.springermedizin.de/resource/supplementary/12992_2010_102_MOESM1_ESM.pdf/9616552)
Supplement: MOESM1 [file 9616552]

### **MEDICAL TOURISTS**

- Vulnerabilities**
- potential exposure to negative health outcomes due to surgery
  - bound by constraints imposed by going abroad for health care
  - limited codes of conduct and responsibility

- Contextual Factors**
- lack of defined role obligations
  - lack of access to specific types of information

**Social Responsibilities**  
- to home communities and health care systems

- expanded responsibilities through engagement with health care systems abroad

- must take steps before departure to minimize and mitigate harms to home community and community abroad

**Vulnerabilities**  
- distanced from personal support networks

- potential exposure to instability while abroad

### **VOLUN- TOURISTS**

- Resources**
- professional codes of conduct and responsibility
  - specialized training

- Contextual Factors**
- highly defined role obligations
  - easy access to information related to professional roles
